# Supplementary material for: Effects of Mindful Engagement and Attention on Reciprocal Caregiver and Client Interactions: A Behavioral Analysis of Moment-to-Moment Changes During Mindfulness Practice
Source: Springer Nature journal article supplement (doi:10.1007/s12671-023-02190-9), 2023-08-01
Supplement: MOESM1 [file 25946704]

STAFF	Engaged PreME	Engaged PostME	Lerning PreME	Learning PostME	Leisure PreME	Leisure PostME	Learning BP PreME	Learning BP PostME	Leisure BP PreME	Leisure BP PostME	Challenging Behaviors OB PreME	Challenging Behaviors OB PostME	Challenging Behaviors ATT PreME	Challenging Behaviors ATT PostME	Challenging Behaviors IMM PreME	Challenging Behaviors IMM PostME	Challenging Behaviors DUR PreME	Challenging Behaviors DUR PostME	Appropriate Behavior OB PreME	Appropriate Behavior OB PostME	Appropriate Behavior ATT PreME	Appropriate Behavior ATT PostME	Appropriate Behavior IMM PreME	Appropriate Behavior IMM PostME	Appropriate Behavior DUR PreME	Appropriate Behavior DUR PostME
1	22	78	2	51	20	27	50	5	10	0	19	5	3	1	5	1	45	1	12	16	0	14	0	2	0	63
2	35	84	5	64	30	20	60	7	15	0	23	6	7	2	2	1	56	1	15	20	2	16	10	2	2	56
3	19	69	3	55	16	14	67	8	12	0	10	2	10	0	4	0	65	0	18	24	4	20	8	3	2	72
4	10	71	5	35	5	36	50	0	0	0	15	3	5	0	7	0	48	0	22	25	7	22	6	3	1	65
5	34	93	10	77	24	16	40	5	5	0	21	5	11	1	2	1	51	1	13	15	3	15	10	2	1	76
6	23	85	4	59	19	26	50	10	10	0	8	1	4	1	4	1	39	1	11	14	2	14	4	2	2	81
7	27	74	7	63	20	11	45	6	0	0	11	2	3	0	5	0	43	0	16	20	3	17	5	3	1	66
8	30	82	9	54	21	28	30	3	0	0	13	3	7	0	3	0	57	0	19	25	5	21	9	4	2	53
9	31	83	15	59	16	24	20	2	12	0	14	3	6	1	2	1	61	1	14	19	4	17	11	3	2	61
10	29	78	11	45	18	33	27	5	15	0	3	0	3	0	1	0	56	0	19	26	1	22	8	4	1	68
11	14	67	3	39	11	28	67	0	10	0	17	4	6	1	5	1	70	1	15	20	5	18	6	3	2	74
12	17	77	6	50	11	27	50	3	5	0	16	4	10	0	2	0	44	0	11	14	2	14	15	2	2	82
13	21	80	6	61	15	19	25	7	5	0	12	3	4	0	6	0	37	0	18	24	3	20	7	2	1	59
14	38	95	20	71	18	24	34	5	4	0	9	2	0	0	0	0	0	0	29	33	8	25	6	3	1	63
15	26	87	14	68	12	19	45	5	10	0	17	4	3	1	4	1	51	1	14	19	5	15	9	1	2	77
16	27	75	5	59	24	26	41	3	9	0	21	5	9	1	1	1	39	1	17	20	3	15	4	1	1	79
17	21	83	15	45	19	31	44	6	13	0	15	4	4	0	2	0	42	0	12	16	6	14	3	1	1	80
18	30	81	13	63	20	24	52	5	11	0	15	5	8	1	5	1	63	1	17	21	2	19	2	2	1	63
19	29	76	6	60	14	17	49	9	0	0	23	6	12	1	4	1	75	1	15	18	1	16	1	1	7	76
20	23	82	11	75	16	21	60	11	9	0	8	2	2	0	1	0	46	0	18	24	7	20	3	3	3	64
21	25	89	13	66	19	16	57	5	12	0	12	3	0	0	0	0	0	0	23	25	0	19	0	2	0	70
22	27	76	8	71	20	21	54	3	0	0	18	5	6	0	3	0	58	0	12	16	2	14	5	1	1	76
23	22	92	4	62	22	23	42	7	5	0	13	3	4	0	2	0	64	0	14	21	5	17	8	2	1	65
24	20	87	19	49	15	26	47	1	9	0	16	4	7	1	2	1	61	1	18	24	5	20	7	3	2	59
25	15	79	14	56	18	16	51	3	7	0	11	2	7	0	5	0	36	0	13	19	7	16	4	3	1	68
26	26	85	9	75	23	20	66	7	5	0	14	3	4	0	4	0	42	0	14	21	3	18	3	4	1	73
27	29	93	7	62	13	19	44	3	3	0	9	2	1	0	1	0	70	0	11	14	5	14	6	1	1	64
28	18	84	14	69	17	21	39	8	3	0	17	4	8	0	3	0	55	0	17	20	6	16	11	2	1	58
29	31	86	16	59	20	24	48	4	9	0	12	3	3	1	3	1	49	1	18	24	3	21	7	4	2	60
30	22	90	12	73	19	27	55	1	11	0	13	3	5	0	2	0	56	0	15	22	4	19	8	3	2	63
